# Supplementary material
Source: ML conference proceedings conference paper supplement (https://openreview.net/forum?id=y9U0IJ2uFr)
Supplement: supplementary_material [file attachment]

## 471 A Proofs

### 472 A.1 Euclidean Projection onto $\mathcal{S}$

473 It amounts to the following problem.

$$\arg \min_{\mathbf{P} \in \mathcal{S}} \|\mathbf{P} - \mathbf{K}\|_2^2. \quad (3)$$

474 With  $\mathbf{W} \in \mathbb{R}^{n \times n}$ , the Lagrangian takes the form:

$$\mathcal{L}(\mathbf{P}, \mathbf{W}) = \|\mathbf{P} - \mathbf{K}\|_2^2 + \langle \mathbf{W}, \mathbf{P} - \mathbf{P}^\top \rangle. \quad (4)$$

475 Cancelling the gradient of  $\mathcal{L}$  with respect to  $\mathbf{P}$  gives  $2(\mathbf{P}^* - \mathbf{K}) + \mathbf{W} - \mathbf{W}^\top = \mathbf{0}$ . Thus  $\mathbf{P}^* =$   
 476  $\mathbf{K} + \frac{1}{2}(\mathbf{W}^\top - \mathbf{W})$ . Using the symmetry constraint on  $\mathbf{P}^*$  yields  $\mathbf{P}^* = \frac{1}{2}(\mathbf{K} + \mathbf{K}^\top)$ . Hence we  
 477 have:

$$\arg \min_{\mathbf{P} \in \mathcal{S}} \|\mathbf{P} - \mathbf{K}\|_2^2 = \frac{1}{2}(\mathbf{K} + \mathbf{K}^\top). \quad (5)$$

### 478 A.2 From Symmetric Entropy-Constrained OT to Sinkhorn Iterations

479 In this section, we derive Sinkhorn iterations from the problem (EOT). Let  $\mathbf{C} \in \mathcal{D}$ . We start by  
 480 making the constraints explicit.

$$\min_{\mathbf{P} \in \mathbb{R}_+^{n \times n}} \langle \mathbf{P}, \mathbf{C} \rangle \quad (6)$$

$$\text{s.t.} \quad \sum_{i \in [n]} H(\mathbf{P}_{i:}) \geq \eta \quad (7)$$

$$\mathbf{P}\mathbf{1} = \mathbf{1}, \quad \mathbf{P} = \mathbf{P}^\top. \quad (8)$$

481 For the above convex problem the Lagrangian writes, where  $\nu \in \mathbb{R}_+$ ,  $\mathbf{f} \in \mathbb{R}^n$  and  $\mathbf{\Gamma} \in \mathbb{R}^{n \times n}$ :

$$\mathcal{L}(\mathbf{P}, \mathbf{f}, \nu, \mathbf{\Gamma}) = \langle \mathbf{P}, \mathbf{C} \rangle + \left\langle \nu, \eta - \sum_{i \in [n]} H(\mathbf{P}_i) \right\rangle + 2\langle \mathbf{f}, \mathbf{1} - \mathbf{P}\mathbf{1} \rangle + \langle \mathbf{\Gamma}, \mathbf{P} - \mathbf{P}^\top \rangle. \quad (9)$$

482 Strong duality holds and the first order KKT condition gives for the optimal primal  $\mathbf{P}^*$  and dual  
 483  $(\nu^*, \mathbf{f}^*, \mathbf{\Gamma}^*)$  variables:

$$\nabla_{\mathbf{P}} \mathcal{L}(\mathbf{P}^*, \mathbf{f}^*, \nu^*, \mathbf{\Gamma}^*) = \mathbf{C} + \nu^* \log \mathbf{P}^* - 2\mathbf{f}^* \mathbf{1}^\top + \mathbf{\Gamma}^* - \mathbf{\Gamma}^{*\top} = \mathbf{0}. \quad (10)$$

484 Since  $\mathbf{P}^*, \mathbf{C} \in \mathcal{S}$  we have  $\mathbf{\Gamma}^* - \mathbf{\Gamma}^{*\top} = \mathbf{f}^* \mathbf{1}^\top - \mathbf{1} \mathbf{f}^{*\top}$ . Hence  $\mathbf{C} + \nu^* \log \mathbf{P}^* - \mathbf{f}^* \oplus \mathbf{f}^* = \mathbf{0}$ .  
 485 Suppose that  $\nu^* = 0$  then the previous reasoning implies that  $\forall (i, j), C_{ij} = f_i^* + f_j^*$ . Using that  
 486  $\mathbf{C} \in \mathcal{D}$  we have  $C_{ii} = C_{jj} = 0$  thus  $\forall i, f_i^* = 0$  and thus this would imply that  $\mathbf{C} = \mathbf{0}$  which is not  
 487 allowed by hypothesis. Therefore  $\nu^* \neq 0$  and the entropy constraint is saturated at the optimum by  
 488 complementary slackness. Isolating  $\mathbf{P}^*$  then yields:

$$\mathbf{P}^* = \exp((\mathbf{f}^* \oplus \mathbf{f}^* - \mathbf{C})/\nu^*). \quad (11)$$

489  $\mathbf{P}^*$  must be primal feasible in particular  $\mathbf{P}^* \mathbf{1} = \mathbf{1}$ . This constraint gives us the Sinkhorn fixed point  
 490 relation for  $\mathbf{f}^*$ :

$$\forall i \in [n], \quad [\mathbf{f}^*]_i = -\nu^* \text{LSE}((\mathbf{f}^* - \mathbf{C}_{:i})/\nu^*), \quad (12)$$

491 where for a vector  $\alpha$ , we use the notation  $\text{LSE}(\alpha) = \log \sum_k \exp(\alpha_k)$ .

### 492 A.3 Proof of Proposition 1

493 We recall the result

494 **Proposition 1.** Let  $\mathbf{C} \in \mathbb{R}^{n \times n}$  without constant rows. Then  $\mathbf{P}^e$  solves the entropic affinity problem  
 495 (EA) with cost  $\mathbf{C}$  if and only if  $\mathbf{P}^e$  is the unique solution of the convex problem

$$\min_{\mathbf{P} \in \mathcal{H}_\xi} \langle \mathbf{P}, \mathbf{C} \rangle. \quad (\text{EA as OT})$$

496 *Proof.* We begin by rewriting the above problem to make the constraints more explicit.

$$\begin{aligned} \min_{\mathbf{P} \in \mathbb{R}_+^{n \times n}} \quad & \langle \mathbf{P}, \mathbf{C} \rangle \\ \text{s.t.} \quad & \forall i, H(\mathbf{P}_{i:}) \geq \log \xi + 1 \\ & \mathbf{P} \mathbf{1} = \mathbf{1}. \end{aligned}$$

497 By concavity of entropy, one has that the entropy constraint is convex thus the above primal problem  
498 is a convex optimization problem. Moreover, the latter is strictly feasible for any  $\xi \in \llbracket n-1 \rrbracket$ .  
499 Therefore Slater's condition is satisfied and strong duality holds.

500 Introducing the dual variables  $\boldsymbol{\lambda} \in \mathbb{R}^n$  and  $\boldsymbol{\varepsilon} \in \mathbb{R}_+^n$ , the Lagrangian of the above problem writes:

$$\mathcal{L}(\mathbf{P}, \boldsymbol{\lambda}, \boldsymbol{\varepsilon}) = \langle \mathbf{P}, \mathbf{C} \rangle + \langle \boldsymbol{\varepsilon}, (\log \xi + 1) \mathbf{1} - \mathbf{H}_r(\mathbf{P}) \rangle + \langle \boldsymbol{\lambda}, \mathbf{1} - \mathbf{P} \mathbf{1} \rangle, \quad (13)$$

501 where we recall that  $\mathbf{H}_r(\mathbf{P}) = (H(\mathbf{P}_{i:}))_i$ . Note that we will deal with the constraint  $\mathbf{P} \in \mathbb{R}_+^{n \times n}$   
502 directly, hence there is no associated dual variable. Since strong duality holds, for any solution  $\mathbf{P}^*$  to  
503 the primal problem and any solution  $(\boldsymbol{\varepsilon}^*, \boldsymbol{\lambda}^*)$  to the dual problem, the pair  $\mathbf{P}^*, (\boldsymbol{\varepsilon}^*, \boldsymbol{\lambda}^*)$  must satisfy  
504 the Karush-Kuhn-Tucker (KKT) conditions. The first-order optimality condition gives:

$$\nabla_{\mathbf{P}} \mathcal{L}(\mathbf{P}^*, \boldsymbol{\varepsilon}^*, \boldsymbol{\lambda}^*) = \mathbf{C} + \text{diag}(\boldsymbol{\varepsilon}^*) \log \mathbf{P}^* - \boldsymbol{\lambda}^* \mathbf{1}^\top = \mathbf{0}. \quad (\text{first-order})$$

505 Assume that there exists  $\ell \in \llbracket n \rrbracket$  such that  $\varepsilon_\ell^* = 0$ . Then (first-order) gives that the  $\ell^{\text{th}}$  row of  $\mathbf{C}$  is  
506 constant which is not allowed by hypothesis. Therefore  $\boldsymbol{\varepsilon}^* > \mathbf{0}$  (i.e.,  $\boldsymbol{\varepsilon}^*$  has positive entries). Thus  
507 isolating  $\mathbf{P}^*$  in the first order condition results in:

$$\mathbf{P}^* = \text{diag}(\mathbf{u}) \exp(-\text{diag}(\boldsymbol{\varepsilon}^*)^{-1} \mathbf{C}) \quad (14)$$

508 where  $\mathbf{u} = \exp(\boldsymbol{\lambda}^* \oslash \boldsymbol{\varepsilon}^*)$ . This matrix must satisfy the stochasticity constraint  $\mathbf{P} \mathbf{1} = \mathbf{1}$ . Hence one  
509 has  $\mathbf{u} = \mathbf{1} \oslash (\exp(\text{diag}(\boldsymbol{\varepsilon}^*)^{-1} \mathbf{C}) \mathbf{1})$  and  $\mathbf{P}^*$  has the form

$$\forall (i, j) \in \llbracket n \rrbracket^2, \quad P_{ij}^* = \frac{\exp(-C_{ij}/\varepsilon_i^*)}{\sum_{\ell} \exp(-C_{i\ell}/\varepsilon_i^*)}. \quad (15)$$

510 As a consequence of  $\boldsymbol{\varepsilon}^* > \mathbf{0}$ , complementary slackness in the KKT conditions gives us that for all  $i$ ,  
511 the entropy constraint is saturated i.e.,  $H(\mathbf{P}_{i:}^*) = \log \xi + 1$ . Therefore  $\mathbf{P}^*$  solves the problem (EA).  
512 Conversely any solution of (EA)  $P_{ij}^* = \frac{\exp(-C_{ij}/\varepsilon_i^*)}{\sum_{\ell} \exp(-C_{i\ell}/\varepsilon_i^*)}$  with  $(\varepsilon_i^*)$  such that  $H(\mathbf{P}_{i:}^*) = \log \xi + 1$  gives  
513 an admissible matrix for  $\min_{\mathbf{P} \in \mathcal{H}_\xi} \langle \mathbf{P}, \mathbf{C} \rangle$  and the associated variables satisfy the KKT conditions  
514 which are sufficient conditions for optimality since the problem is convex.  $\square$

#### 515 A.4 Proof of Proposition 4 and Proposition 5

516 The goal of this section is to prove the following results:

517 **Proposition 4** (Saturation of the entropies). *Let  $\mathbf{C} \in \mathcal{S}$  with zero diagonal, then (SEA) with cost  $\mathbf{C}$   
518 has a unique solution that we denote by  $\mathbf{P}^{\text{se}}$ . If moreover  $\mathbf{C} \in \mathcal{D}$ , then for at least  $n-1$  indices  
519  $i \in \llbracket n \rrbracket$  the solution satisfies  $H(\mathbf{P}_{i:}^{\text{se}}) = \log \xi + 1$ .*

520 **Proposition 5** (Solving for SEA). *Let  $\mathbf{C} \in \mathcal{D}$ ,  $\mathcal{L}(\mathbf{P}, \boldsymbol{\gamma}, \boldsymbol{\lambda}) = \langle \mathbf{P}, \mathbf{C} \rangle + \langle \boldsymbol{\gamma}, (\log \xi + 1) \mathbf{1} - \mathbf{H}_r(\mathbf{P}) \rangle +$   
521  $\langle \boldsymbol{\lambda}, \mathbf{1} - \mathbf{P} \mathbf{1} \rangle$  and  $q(\boldsymbol{\gamma}, \boldsymbol{\lambda}) = \min_{\mathbf{P} \in \mathbb{R}_+^{n \times n} \cap \mathcal{S}} \mathcal{L}(\mathbf{P}, \boldsymbol{\gamma}, \boldsymbol{\lambda})$ . Strong duality holds for (SEA). Moreover,  
522 let  $\boldsymbol{\gamma}^*, \boldsymbol{\lambda}^* \in \arg\max_{\boldsymbol{\gamma} \geq 0, \boldsymbol{\lambda}} q(\boldsymbol{\gamma}, \boldsymbol{\lambda})$  be the optimal dual variables respectively associated with the  
523 entropy and marginal constraints. Then, for at least  $n-1$  indices  $i \in \llbracket n \rrbracket$ ,  $\gamma_i^* > 0$ . When  $\forall i \in \llbracket n \rrbracket$ ,  
524  $\gamma_i^* > 0$  then  $\mathbf{H}_r(\mathbf{P}^{\text{se}}) = (\log \xi + 1) \mathbf{1}$  and  $\mathbf{P}^{\text{se}}$  has the form*

$$\mathbf{P}^{\text{se}} = \exp((\boldsymbol{\lambda}^* \oplus \boldsymbol{\lambda}^* - 2\mathbf{C}) \oslash (\boldsymbol{\gamma}^* \oplus \boldsymbol{\gamma}^*)). \quad (2)$$

525 The unicity of the solution in Proposition 4 is a consequence of the following lemma

526 **Lemma 7.** *Let  $\mathbf{C} \neq \mathbf{0} \in \mathcal{S}$  with zero diagonal. Then the problem  $\min_{\mathbf{P} \in \mathcal{H}_\xi \cap \mathcal{S}} \langle \mathbf{P}, \mathbf{C} \rangle$  has a unique  
527 solution.*

528 *Proof.* Making the constraints explicit, the primal problem of symmetric entropic affinity takes the  
529 following form

$$\begin{aligned} \min_{\mathbf{P} \in \mathbb{R}_+^{n \times n}} \quad & \langle \mathbf{P}, \mathbf{C} \rangle \\ \text{s.t.} \quad & \forall i, H(\mathbf{P}_{i:}) \geq \log \xi + 1 \\ & \mathbf{P} \mathbf{1} = \mathbf{1}, \quad \mathbf{P} = \mathbf{P}^\top. \end{aligned} \quad (\text{SEA})$$

Suppose that the solution is not unique *i.e.*, there exists a couple of optimal solutions  $(\mathbf{P}_1, \mathbf{P}_2)$  that satisfy the constraints of (SEA) and such that  $\langle \mathbf{P}_1, \mathbf{C} \rangle = \langle \mathbf{P}_2, \mathbf{C} \rangle$ . For  $i \in \llbracket n \rrbracket$ , we denote the function  $f_i : \mathbf{P} \rightarrow (\log \xi + 1) - H(\mathbf{P}_i)$ . Then  $f_i$  is continuous, strictly convex and the entropy conditions of (SEA) can be written as  $\forall i \in \llbracket n \rrbracket, f_i(\mathbf{P}) \leq 0$ .

Now consider  $\mathbf{Q} = \frac{1}{2}(\mathbf{P}_1 + \mathbf{P}_2)$ . Then clearly  $\mathbf{Q}\mathbf{1} = \mathbf{1}, \mathbf{Q} = \mathbf{Q}^\top$ . Since  $f_i$  is strictly convex we have  $f_i(\mathbf{Q}) = f_i(\frac{1}{2}\mathbf{P}_1 + \frac{1}{2}\mathbf{P}_2) < \frac{1}{2}f_i(\mathbf{P}_1) + \frac{1}{2}f_i(\mathbf{P}_2) \leq 0$ . Thus  $f_i(\mathbf{Q}) < 0$  for any  $i \in \llbracket n \rrbracket$ . Take any  $\varepsilon > 0$  and  $i \in \llbracket n \rrbracket$ . By continuity of  $f_i$  there exists  $\delta_i > 0$  such that, for any  $\mathbf{H}$  with  $\|\mathbf{H}\|_F \leq \delta_i$ , we have  $f_i(\mathbf{Q} + \mathbf{H}) < f_i(\mathbf{Q}) + \varepsilon$ . Take  $\varepsilon > 0$  such that  $\forall i \in \llbracket n \rrbracket, 0 < \varepsilon < -\frac{1}{2}f_i(\mathbf{Q})$  (this is possible since for any  $i \in \llbracket n \rrbracket, f_i(\mathbf{Q}) < 0$ ) and  $\mathbf{H}$  with  $\|\mathbf{H}\|_F \leq \min_{i \in \llbracket n \rrbracket} \delta_i$ . Then for any  $i \in \llbracket n \rrbracket, f_i(\mathbf{Q} + \mathbf{H}) < 0$ . In other words, we have proven that there exists  $\eta > 0$  such that for any  $\mathbf{H}$  such that  $\|\mathbf{H}\|_F \leq \eta$ , it holds:  $\forall i \in \llbracket n \rrbracket, f_i(\mathbf{Q} + \mathbf{H}) < 0$ .

Now let us take  $\mathbf{H}$  as the Laplacian matrix associated to  $\mathbf{C}$  *i.e.*, for any  $(i, j) \in \llbracket n \rrbracket^2, H_{ij} = -C_{ij}$  if  $i \neq j$  and  $\sum_l C_{il}$  otherwise. Then we have  $\langle \mathbf{H}, \mathbf{C} \rangle = -\sum_{i \neq j} C_{ij}^2 + 0 = -\sum_{i \neq j} C_{ij}^2 \neq 0$  since  $\mathbf{C}$  has zero diagonal (and is nonzero). Moreover,  $\mathbf{H} = \mathbf{H}^\top$  since  $\mathbf{C}$  is symmetric and  $\mathbf{H}\mathbf{1} = \mathbf{0}$  by construction. Consider for  $0 < \beta \leq \frac{\eta}{\|\mathbf{H}\|_F}$ , the matrix  $\mathbf{H}_\beta(\mathbf{C}) := -\beta \text{sign}(\langle \mathbf{H}, \mathbf{C} \rangle) \mathbf{H}$ . Then  $\|\mathbf{H}_\beta(\mathbf{C})\|_F = \beta \|\mathbf{H}\|_F \leq \eta$ . By the previous reasoning one has:  $\forall i \in \llbracket n \rrbracket, f_i(\mathbf{Q} + \mathbf{H}_\beta(\mathbf{C})) < 0$ . Moreover,  $(\mathbf{Q} + \mathbf{H}_\beta(\mathbf{C}))^\top = \mathbf{Q} + \mathbf{H}_\beta(\mathbf{C})$  and  $(\mathbf{Q} + \mathbf{H}_\beta(\mathbf{C}))\mathbf{1} = \mathbf{1}$ . For  $\beta$  small enough we have  $\mathbf{Q} + \mathbf{H}_\beta(\mathbf{C}) \in \mathbb{R}_+^{n \times n}$  and thus there is a  $\beta$  (that depends on  $\mathbf{P}_1$  and  $\mathbf{P}_2$ ) such that  $\mathbf{Q} + \mathbf{H}_\beta(\mathbf{C})$  is admissible *i.e.*, satisfies the constraints of (SEA). Then, for such  $\beta$ ,

$$\begin{aligned} \langle \mathbf{C}, \mathbf{Q} + \mathbf{H}_\beta(\mathbf{C}) \rangle - \langle \mathbf{C}, \mathbf{P}_1 \rangle &= \frac{1}{2} \langle \mathbf{C}, \mathbf{P}_1 + \mathbf{P}_2 \rangle + \langle \mathbf{C}, \mathbf{H}_\beta(\mathbf{C}) \rangle - \langle \mathbf{C}, \mathbf{P}_1 \rangle \\ &= \langle \mathbf{C}, \mathbf{H}_\beta(\mathbf{C}) \rangle = -\beta \text{sign}(\langle \mathbf{H}, \mathbf{C} \rangle) \langle \mathbf{H}, \mathbf{C} \rangle < 0. \end{aligned} \quad (16)$$

Thus  $\langle \mathbf{C}, \mathbf{Q} + \mathbf{H}_\beta(\mathbf{C}) \rangle < \langle \mathbf{C}, \mathbf{P}_1 \rangle$  which leads to a contradiction.  $\square$

We can now prove the rest of the claims of Proposition 4 and Proposition 5

*Proof.* Let  $\mathbf{C} \in \mathcal{D}$ . We first prove Proposition 4. The unicity is a consequence of Lemma 7. For the saturation of the entropies we consider the Lagrangian of the problem (SEA) that writes

$$\mathcal{L}(\mathbf{P}, \boldsymbol{\lambda}, \boldsymbol{\gamma}, \boldsymbol{\Gamma}) = \langle \mathbf{P}, \mathbf{C} \rangle + \langle \boldsymbol{\gamma}, (\log \xi + 1)\mathbf{1} - H_r(\mathbf{P}) \rangle + \langle \boldsymbol{\lambda}, \mathbf{1} - \mathbf{P}\mathbf{1} \rangle + \langle \boldsymbol{\Gamma}, \mathbf{P} - \mathbf{P}^\top \rangle$$

for dual variables  $\boldsymbol{\gamma} \in \mathbb{R}_+^n, \boldsymbol{\lambda} \in \mathbb{R}^n$  and  $\boldsymbol{\Gamma} \in \mathbb{R}^{n \times n}$ . Strong duality holds by Slater's conditions because  $\frac{1}{n}\mathbf{1}\mathbf{1}^\top$  is strictly feasible for  $\xi \leq n - 1$ . Since strong duality holds, for any solution  $\mathbf{P}^*$  to the primal problem and any solution  $(\boldsymbol{\gamma}^*, \boldsymbol{\lambda}^*, \boldsymbol{\Gamma}^*)$  to the dual problem, the pair  $\mathbf{P}^*, (\boldsymbol{\gamma}^*, \boldsymbol{\lambda}^*, \boldsymbol{\Gamma}^*)$  must satisfy the KKT conditions. They can be stated as follows:

$$\begin{aligned} \mathbf{C} + \text{diag}(\boldsymbol{\gamma}^*) \log \mathbf{P}^* - \boldsymbol{\lambda}^* \mathbf{1}^\top + \boldsymbol{\Gamma}^* - \boldsymbol{\Gamma}^{*\top} &= \mathbf{0} \\ \mathbf{P}^* \mathbf{1} &= \mathbf{1}, H_r(\mathbf{P}^*) \geq (\log \xi + 1)\mathbf{1}, \mathbf{P}^* = \mathbf{P}^{*\top} \\ \boldsymbol{\gamma}^* &\geq \mathbf{0} \\ \forall i, \gamma_i^* (H(\mathbf{P}_{i:}^*) - (\log \xi + 1)) &= 0. \end{aligned} \quad (\text{KKT-SEA})$$

Let us denote  $I = \{\ell \in \llbracket n \rrbracket \text{ s.t. } \gamma_\ell^* = 0\}$ . For  $\ell \in I$ , using the first-order condition, one has for  $i \in \llbracket n \rrbracket, C_{\ell i} = \lambda_\ell^* - \Gamma_{\ell i}^* + \Gamma_{i\ell}^*$ . Since  $\mathbf{C} \in \mathcal{D}$ , we have  $C_{\ell\ell} = 0$  thus  $\lambda_\ell^* = 0$  and  $C_{\ell i} = \Gamma_{i\ell}^* - \Gamma_{\ell i}^*$ . For  $(\ell, \ell') \in I^2$ , one has  $C_{\ell\ell'} = \Gamma_{\ell'\ell}^* - \Gamma_{\ell\ell'}^* = -(\Gamma_{\ell\ell'}^* - \Gamma_{\ell'\ell}^*) = -C_{\ell'\ell}$ .  $\mathbf{C}$  is symmetric thus  $C_{\ell\ell'} = 0$ . Since  $\mathbf{C}$  only has null entries on the diagonal, this shows that  $\ell = \ell'$  and therefore  $I$  has at most one element. By complementary slackness condition (last row of the KKT-SEA conditions) it holds that  $\forall i \neq \ell, H(\mathbf{P}_{i:}^*) = \log \xi + 1$ . Since the solution of (SEA) is unique  $\mathbf{P}^* = \mathbf{P}^{\text{se}}$  and thus  $\forall i \neq \ell, H(\mathbf{P}_{i:}^{\text{se}}) = \log \xi + 1$  which proves Proposition 4 but also that for at least  $n - 1$  indices  $\gamma_i^* > 0$ . Moreover, from the KKT conditions we have

$$\forall (i, j) \in \llbracket n \rrbracket^2, \Gamma_{ji}^* - \Gamma_{ij}^* = C_{ij} + \gamma_i^* \log P_{ij}^* - \lambda_i^*. \quad (17)$$

Now take  $(i, j) \in \llbracket n \rrbracket^2$  fixed. From the previous equality  $\Gamma_{ji}^* - \Gamma_{ij}^* = C_{ij} + \gamma_i^* \log P_{ij}^* - \lambda_i^*$  but also  $\Gamma_{ij}^* - \Gamma_{ji}^* = C_{ji} + \gamma_j^* \log P_{ji}^* - \lambda_j^*$ . Using that  $\mathbf{P}^* = (\mathbf{P}^*)^\top$  and  $\mathbf{C} \in \mathcal{S}$  we get  $\Gamma_{ij}^* - \Gamma_{ji}^* = C_{ij} + \gamma_j^* \log P_{ij}^* - \lambda_j^*$ . But  $\Gamma_{ij}^* - \Gamma_{ji}^* = -(\Gamma_{ji}^* - \Gamma_{ij}^*)$  which gives

$$C_{ij} + \gamma_j^* \log P_{ij}^* - \lambda_j^* = -(C_{ij} + \gamma_i^* \log P_{ij}^* - \lambda_i^*). \quad (18)$$

566 This implies

$$\forall (i, j) \in \llbracket n \rrbracket^2, 2C_{ij} + (\gamma_i^* + \gamma_j^*) \log P_{ij}^* - (\lambda_i^* + \lambda_j^*) = 0. \quad (19)$$

567 Consequently, if  $\gamma^* > 0$  we have the desired form from the above equation and by complementary  
568 slackness  $H_r(\mathbf{P}^{\text{se}}) = (\log \xi + 1)\mathbf{1}$  which proves Proposition 5. Note that otherwise, it holds

$$\forall (i, j) \neq (\ell, \ell), P_{ij}^* = \exp \left( \frac{\lambda_i^* + \lambda_j^* - 2C_{ij}}{\gamma_i^* + \gamma_j^*} \right). \quad (20)$$

569

□

## 570 A.5 EA and SEA as a KL projection

571 We prove the characterization as a projection of (EA) in Lemma 8 and of (SEA) in Lemma 9.

572 **Lemma 8.** Let  $\mathbf{C} \in \mathcal{D}, \sigma > 0$  and  $\mathbf{K}_\sigma = \exp(-\mathbf{C}/\sigma)$ . Then for any  $\sigma \leq \min_i \varepsilon_i^*$ , it holds  
573  $\mathbf{P}^{\text{se}} = \text{Proj}_{\mathcal{H}_\xi}^{\text{KL}}(\mathbf{K}_\sigma) = \arg \min_{\mathbf{P} \in \mathcal{H}_\xi} \text{KL}(\mathbf{P}|\mathbf{K}_\sigma)$ .

574 *Proof.* The KL projection of  $\mathbf{K}$  onto  $\mathcal{H}_\xi$  reads

$$\min_{\mathbf{P} \in \mathbb{R}_+^{n \times n}} \text{KL}(\mathbf{P}|\mathbf{K}) \quad (21)$$

$$\text{s.t. } \forall i, H(\mathbf{P}_{i:}) \geq \log \xi + 1 \quad (22)$$

$$\mathbf{P}\mathbf{1} = \mathbf{1}. \quad (23)$$

575 Introducing the dual variables  $\boldsymbol{\lambda} \in \mathbb{R}^n$  and  $\boldsymbol{\kappa} \in \mathbb{R}_+^n$ , the Lagrangian of this problem reads:

$$\mathcal{L}(\mathbf{P}, \boldsymbol{\lambda}, \boldsymbol{\kappa}) = \text{KL}(\mathbf{P}|\mathbf{K}) + \langle \boldsymbol{\kappa}, (\log \xi + 1)\mathbf{1} - H(\mathbf{P}) \rangle + \langle \boldsymbol{\lambda}, \mathbf{1} - \mathbf{P}\mathbf{1} \rangle \quad (24)$$

576 Strong duality holds hence for any solution  $\mathbf{P}^*$  to the above primal problem and any solution  $(\boldsymbol{\kappa}^*, \boldsymbol{\lambda}^*)$   
577 to the dual problem, the pair  $\mathbf{P}^*, (\boldsymbol{\kappa}^*, \boldsymbol{\lambda}^*)$  must satisfy the KKT conditions. The first-order optimality  
578 condition gives:

$$\nabla_{\mathbf{P}} \mathcal{L}(\mathbf{P}^*, \boldsymbol{\kappa}^*, \boldsymbol{\lambda}^*) = \log(\mathbf{P}^* \odot \mathbf{K}) + \text{diag}(\boldsymbol{\kappa}^*) \log \mathbf{P}^* - \boldsymbol{\lambda}^* \mathbf{1}^\top = \mathbf{0}. \quad (25)$$

579 Solving for  $\boldsymbol{\lambda}^*$  given the stochasticity constraint and isolating  $\mathbf{P}^*$  gives

$$\forall (i, j) \in \llbracket n \rrbracket^2, P_{ij}^* = \frac{\exp((\log K_{ij})/(1 + \kappa_i^*))}{\sum_\ell \exp((\log K_{i\ell})/(1 + \kappa_i^*))}. \quad (26)$$

580 We now consider  $\mathbf{P}^*$  as a function of  $\boldsymbol{\kappa}$ . Plugging this expression back in  $\mathcal{L}$  yields the dual function  
581  $\boldsymbol{\kappa} \mapsto \mathcal{G}(\boldsymbol{\kappa})$ . The latter is concave as any dual function and its gradient reads:

$$\nabla_{\boldsymbol{\kappa}} \mathcal{G}(\boldsymbol{\kappa}) = (\log \xi + 1)\mathbf{1} - H(\mathbf{P}^*(\boldsymbol{\kappa})). \quad (27)$$

582 Denoting by  $\boldsymbol{\rho} = \mathbf{1} + \boldsymbol{\kappa}$  and taking the dual feasibility constraint  $\boldsymbol{\kappa} \geq \mathbf{0}$  into account gives the  
583 solution: for any  $i$ ,  $\rho_i^* = \max(\varepsilon_i^*, 1)$  where  $\varepsilon^*$  solves (EA) with cost  $\mathbf{C} = -\log \mathbf{K}$ . Moreover we  
584 have that  $\sigma \leq \min(\varepsilon^*)$  where  $\varepsilon^* \in (\mathbb{R}_+^*)^n$  solves (EA). Therefore for any  $i \in \llbracket n \rrbracket$ , one has  $\varepsilon_i^*/\sigma \geq 1$ .  
585 Thus there exists  $\kappa_i^* \in \mathbb{R}_+$  such that  $\sigma(1 + \kappa_i^*) = \varepsilon_i^*$ .

586 This  $\boldsymbol{\kappa}^*$  cancels the above gradient i.e.,  $(\log \xi + 1)\mathbf{1} = H(\mathbf{P}^*(\boldsymbol{\kappa}^*))$  thus solves the dual problem.  
587 Therefore given the expression of  $\mathbf{P}^*$  we have that  $\text{Proj}_{\mathcal{H}_\xi}^{\text{KL}}(\mathbf{K}) = \mathbf{P}^e$ . □

588 **Lemma 9.** Let  $\mathbf{C} \in \mathcal{D}, \sigma > 0$  and  $\mathbf{K}_\sigma = \exp(-\mathbf{C}/\sigma)$ . Suppose that the optimal dual variable  $\gamma^*$   
589 associated with the entropy constraint of (SEA) is positive. Then for any  $\sigma \leq \min_i \gamma_i^*$ , it holds  
590  $\mathbf{P}^{\text{se}} = \text{Proj}_{\mathcal{H}_\xi \cap \mathcal{S}}^{\text{KL}}(\mathbf{K}_\sigma)$ .

591 *Proof.* Let  $\sigma > 0$ . The KL projection of  $\mathbf{K}$  onto  $\mathcal{H}_\xi \cap \mathcal{S}$  boils down to the following optimization  
592 problem.

$$\begin{aligned} \min_{\mathbf{P} \in \mathbb{R}_+^{n \times n}} \quad & \text{KL}(\mathbf{P}|\mathbf{K}_\sigma) \\ \text{s.t.} \quad & \forall i, H(\mathbf{P}_{i:}) \geq \log \xi + 1 \\ & \mathbf{P}\mathbf{1} = \mathbf{1}, \quad \mathbf{P}^\top = \mathbf{P}. \end{aligned} \quad (\text{SEA-Proj})$$

By strong convexity of  $\mathbf{P} \rightarrow \text{KL}(\mathbf{P}|\mathbf{K}_\sigma)$  and convexity of the constraints the problem (SEA-Proj) admits a unique solution. Moreover, the Lagrangian of this problem takes the following form, where  $\omega \in \mathbb{R}_+^n$ ,  $\mu \in \mathbb{R}^n$  and  $\Gamma \in \mathbb{R}^{n \times n}$ :

$$\mathcal{L}(\mathbf{P}, \mu, \omega, \Gamma) = \text{KL}(\mathbf{P}|\mathbf{K}_\sigma) + \langle \omega, (\log \xi + 1)\mathbf{1} - \text{H}_r(\mathbf{P}) \rangle + \langle \mu, \mathbf{1} - \mathbf{P}\mathbf{1} \rangle + \langle \beta, \mathbf{P} - \mathbf{P}^\top \rangle.$$

Strong duality holds by Slater's conditions thus the KKT conditions are necessary and sufficient. In particular if  $\mathbf{P}^*$  and  $(\omega^*, \mu^*, \beta^*)$  satisfy

$$\begin{aligned} \nabla_{\mathbf{P}} \mathcal{L}(\mathbf{P}^*, \mu^*, \omega^*, \Gamma^*) &= \log(\mathbf{P}^* \odot \mathbf{K}) + \text{diag}(\omega^*) \log \mathbf{P}^* - \mu^* \mathbf{1}^\top + \beta^* - \beta^{*\top} = \mathbf{0} \\ \mathbf{P}^* \mathbf{1} &= \mathbf{1}, \text{H}_r(\mathbf{P}^*) \geq (\log \xi + 1)\mathbf{1}, \mathbf{P}^* = \mathbf{P}^{*\top} \\ \omega^* &\geq \mathbf{0} \\ \forall i, \omega_i^* (\text{H}(\mathbf{P}_{i:}^*) - (\log \xi + 1)) &= 0. \end{aligned} \quad (\text{KKT-Proj})$$

then  $\mathbf{P}^*$  is a solution to (SEA-Proj) and  $(\omega^*, \mu^*, \beta^*)$  are optimal dual variables. The first condition rewrites

$$\forall (i, j), \log(P_{ij}^*) + \frac{1}{\sigma} C_{ij} + \omega_i^* \log(P_{ij}^*) - \mu_i^* + \beta_{ij}^* - \beta_{ji}^* = 0, \quad (28)$$

which is equivalent to

$$\forall (i, j), \sigma(1 + \omega_i^*) \log(P_{ij}^*) + C_{ij} - \sigma \mu_i^* + \sigma(\beta_{ij}^* - \beta_{ji}^*) = 0. \quad (29)$$

Now take  $\mathbf{P}^{\text{se}}$  the optimal solution of (SEA). As written in the proof Proposition 5 of  $\mathbf{P}^{\text{se}}$  and the optimal dual variables  $(\gamma^*, \lambda^*, \Gamma^*)$  satisfy the KKT conditions:

$$\begin{aligned} \forall (i, j), C_{ij} + \gamma_i^* \log P_{ij}^{\text{se}} - \lambda_i^* + \Gamma_{ij}^* - \Gamma_{ji}^* &= \mathbf{0} \\ \mathbf{P}^{\text{se}} \mathbf{1} &= \mathbf{1}, \text{H}_r(\mathbf{P}^{\text{se}}) \geq (\log \xi + 1)\mathbf{1}, \mathbf{P}^{\text{se}} = (\mathbf{P}^{\text{se}})^\top \\ \gamma^* &\geq \mathbf{0} \\ \forall i, \gamma_i^* (\text{H}(\mathbf{P}_{i:}^{\text{se}}) - (\log \xi + 1)) &= 0. \end{aligned} \quad (\text{KKT-SEA})$$

By hypothesis  $\gamma^* > 0$  which gives  $\forall i, \text{H}(\mathbf{P}_{i:}^{\text{se}}) - (\log \xi + 1) = 0$ . Now take  $0 < \sigma \leq \min_i \gamma_i^*$  and define  $\forall i, \omega_i^* = \frac{\gamma_i^*}{\sigma} - 1$ . Using the hypothesis on  $\sigma$  we have  $\forall i, \omega_i^* \geq 0$  and  $\omega^*$  satisfies  $\forall i, \sigma(1 + \omega_i^*) = \gamma_i^*$ . Moreover for any  $i \in \llbracket n \rrbracket$

$$\omega_i^* (\text{H}(\mathbf{P}_{i:}^{\text{se}}) - (\log \xi + 1)) = 0. \quad (30)$$

Define also  $\forall i, \mu_i^* = \lambda_i^* / \sigma$  and  $\forall (i, j), \beta_{ij}^* = \Gamma_{ij}^* / \sigma$ . Since  $\mathbf{P}^{\text{se}}, (\gamma^*, \lambda^*, \Gamma^*)$  satisfies the KKT conditions (KKT-SEA) then by the previous reasoning  $\mathbf{P}^{\text{se}}, (\omega^*, \mu^*, \beta^*)$  satisfy the KKT conditions (KKT-Proj) and in particular  $\mathbf{P}^{\text{se}}$  is an optimal solution of (SEA-Proj) since KKT conditions are sufficient. Thus we have proven that  $\mathbf{P}^{\text{se}} \in \arg \min_{\mathbf{P} \in \mathcal{H}_\xi \cap \mathcal{S}} \text{KL}(\mathbf{P}|\mathbf{K}_\sigma)$  and by the uniqueness of the solution this is in fact an equality.  $\square$

## B Alternating Bregman Projections for Solving (SEA)

For  $\sigma > 0$  and  $\mathbf{K}_\sigma = \exp(-\mathbf{C}/\sigma)$ , we introduce  $\mathbf{P}_\sigma^{\text{se}} = \text{Proj}_{\mathcal{H}_\xi \cap \mathcal{S}}^{\text{KL}}(\mathbf{K}_\sigma)$ . Note that Lemma 9 gives us that when  $\sigma \leq \min_i \gamma_i^*$  ( $\gamma^*$  is defined as the solution in  $\gamma$  of the Dual-SEA problem), we get  $\mathbf{P}_\sigma^{\text{se}} = \mathbf{P}^{\text{se}}$ . In Section 3.2, we have seen a dual ascent algorithm to compute  $\mathbf{P}^{\text{se}}$ . We now provide an alternative computational approach to compute  $\mathbf{P}_\sigma^{\text{se}}$  for any  $\sigma$ . In particular, when  $\sigma \leq \min_i \gamma_i^*$ , the presented approach provides an alternative to dual ascent for solving (SEA).

To compute  $\mathbf{P}_\sigma^{\text{se}}$ , one can rely on the well-studied convergence of alternating Bregman projection methods [4]. The core idea is to alternate projection onto  $\mathcal{H}_\xi$  with the projection onto  $\mathcal{S}$ . As  $\mathcal{H}_\xi$  is not affine, one needs to resort to the Dykstra procedure [13] described in Algorithm 1. Note that Dykstra's algorithm can be applied to any Bregman divergence including KL [8] with guarantees [1].

---

**Algorithm 1** *Dijkstra* for computing  $\mathbf{P}_\sigma^{\text{se}}$ 


---

```

1: Input: cost  $\mathbf{C}$ , perplexity  $\xi$ , scaling  $\sigma$ 
2:  $(\mathbf{P}_s, \Xi) \leftarrow (\exp(-\mathbf{C}/\sigma), \mathbf{11}^\top)$ 
3: while not converged do
4:    $\mathbf{P}_h \leftarrow \text{Proj}_{\mathcal{H}_\xi}^{\text{KL}}(\mathbf{P}_s \odot \Xi)$ 
5:    $\Xi \leftarrow \Xi \odot \mathbf{P}_s \odot \mathbf{P}_h$ 
6:    $\mathbf{P}_s \leftarrow \text{Proj}_{\mathcal{S}}^{\text{KL}}(\mathbf{P}_h)$ 
7: end while
8: Output:  $\mathbf{P}_s$ 

```

---

621 The projection-based strategy necessitates rescaling the data beforehand. This factor  $\sigma$  shrinks the  
622 data such that row-wise entropies are controlled when projecting onto  $\mathcal{H}_\xi$ . As such, choosing a  $\sigma$  too  
623 high might result in some entropies being unsaturated while a  $\sigma$  too small generally leads to slow  
624 convergence.

625 We now describe how to perform the two KL projection steps.

626 **Projection onto  $\mathcal{S}$ .** The KL projection onto  $\mathcal{S}$  of  $\mathbf{K} \in \mathbb{R}_+^{n \times n}$  amounts to the following problem.

$$\arg \min_{\mathbf{P} \in \mathcal{S}} \text{KL}(\mathbf{P}|\mathbf{K}). \quad (31)$$

627 For this problem the Lagrangian reads, where  $\mathbf{W} \in \mathbb{R}^{n \times n}$  is a dual variable:

$$\mathcal{L}(\mathbf{P}, \mathbf{W}) = \text{KL}(\mathbf{P}|\mathbf{K}) + \langle \mathbf{W}, \mathbf{P} - \mathbf{P}^\top \rangle. \quad (32)$$

628 Similarly as before, if we cancel the gradient of  $\mathcal{L}$  with respect to  $\mathbf{P}$  we obtain  $\log(\mathbf{P}^* \odot \mathbf{K}) +$   
629  $\mathbf{W} - \mathbf{W}^\top = \mathbf{0}$ . Thus  $\mathbf{P}^* = \exp(\mathbf{W} - \mathbf{W}^\top) \odot \mathbf{K}$ . We must also have the primal feasibility that is  
630  $\mathbf{P}^* = \mathbf{P}^{*\top}$ . Plugging the expression in this condition leads to  $\mathbf{W} - \mathbf{W}^\top = \frac{1}{2} \log(\mathbf{K}^\top \odot \mathbf{K})$ . Hence  
631 plugging it back we get  $\mathbf{P}^* = \exp(\frac{1}{2} \log(\mathbf{K}^\top \odot \mathbf{K})) \odot \mathbf{K} = (\mathbf{K}^\top \odot \mathbf{K})^{\odot \frac{1}{2}} \odot \mathbf{K} = (\mathbf{K} \odot \mathbf{K}^\top)^{\odot \frac{1}{2}}$ .  
632 Overall the projection reads:

$$\arg \min_{\mathbf{P} \in \mathcal{S}} \text{KL}(\mathbf{P}|\mathbf{K}) = (\mathbf{K} \odot \mathbf{K}^\top)^{\odot \frac{1}{2}}. \quad (33)$$

633 **Projection onto  $\mathcal{H}_\xi$ .** Concerning the entropic projection, one can compute  $\text{Proj}_{\mathcal{H}_\xi}^{\text{KL}}: \mathcal{S} \rightarrow \mathcal{H}_\xi$  using a  
634 slight adaptation of Lemma 8. For any  $\mathbf{P} \in \mathcal{S}$ , it holds

$$\forall (i, j), \quad \text{Proj}_{\mathcal{H}_\xi}^{\text{KL}}(\mathbf{P})_{ij} = \frac{\exp(-\log P_{ij}/\rho_i)}{\sum_\ell \exp(-\log P_{i\ell}/\rho_i)} \quad (34)$$

635 where for any  $i$ ,  $\rho_i = \max(\varepsilon_i^*, 1)$  where  $\varepsilon^*$  solves (EA) with cost  $\mathbf{C} = -\log \mathbf{K}$ . Note that this  
636 projection is more efficient to compute than  $\mathbf{P}^e$  as one can stop the search when the upper bound on  
637 the root becomes smaller than one.
